# Supplementary material for: A micro-architectural evaluation of osteoporotic human femoral heads to guide implant placement in proximal femoral fractures
Source: PubMed Central journal article supplement — Acta Orthop. 2013 Oct;84(5):453–9. doi: 10.3109/17453674.2013.842432 (PMC3822129; doi:10.3109/17453674.2013.842432), 2013-10
Supplement: ORT-84-453-s6125.pdf [file ORT-84-453-s6125.pdf]

## Supplementary article data

# A micro-architectural evaluation of osteoporotic human femoral heads to guide implant placement in proximal femoral fractures

Paul J Jenkins<sup>1</sup>, Rishi Ramaesh<sup>1</sup>, Pankaj Pankaj<sup>2</sup>, James T Patton<sup>3</sup>, Colin R Howie<sup>3</sup>, Jérôme M Goffin<sup>1</sup>, Andrew van der Merwe<sup>1</sup>, Robert J Wallace<sup>1</sup>, Daniel E Porter<sup>1</sup>, and A Hamish Simpson<sup>1</sup>

<sup>1</sup>Department of Orthopaedics, University of Edinburgh; <sup>2</sup>School of Engineering and Electronics, University of Edinburgh; <sup>3</sup>Edinburgh Royal Infirmary, Edinburgh, UK

Correspondence: Paul.Jenkins@ed.ac.uk

Submitted 13-01-02. Accepted 13-07-05

Table 3. p-values for post-hoc multiple comparisons of architectural indices of cube 14 (central) with the other cubes. Overall p- and F-values for the Friedman repeated-measures non-parametric test have been reported for each measure

| Cube 14 versus: | BV/TV    | Structural model index | Degree of anisotropy | Connectivity density | Trabecular thickness |
|-----------------|----------|------------------------|----------------------|----------------------|----------------------|
| 1               | 0.4      | 0.3                    | 1                    | > 1                  | 0.5                  |
| 2               | 0.006    | 0.001                  | > 1                  | > 1                  | 0.5                  |
| 3               | < 0.0001 | 0.0002                 | > 1                  | > 1                  | < 0.0001             |
| 4               | > 1      | > 1                    | > 1                  | > 1                  | > 1                  |
| 5               | 0.6      | 0.2                    | > 1                  | > 1                  | > 1                  |
| 6               | 0.001    | 0.001                  | > 1                  | > 1                  | 0.0005               |
| 7               | 0.1      | 0.08                   | > 1                  | > 1                  | 0.006                |
| 8               | 0.006    | 0.02                   | > 1                  | > 1                  | 0.01                 |
| 9               | 0.0002   | 0.0003                 | > 1                  | > 1                  | 0.0002               |
| 10              | > 1      | > 1                    | 0.3                  | > 1                  | 0.7                  |
| 11              | > 1      | > 1                    | > 1                  | > 1                  | 0.3                  |
| 12              | 0.002    | 0.005                  | > 1                  | > 1                  | 0.0001               |
| 13              | > 1      | > 1                    | > 1                  | > 1                  | > 1                  |
| 14              |          |                        |                      |                      |                      |
| 15              | 0.02     | 0.007                  | > 1                  | 1                    | 0.06                 |
| 16              | 0.26     | 0.41                   | > 1                  | > 1                  | 0.117                |
| 17              | > 1      | 0.7                    | > 1                  | > 1                  | > 1                  |
| 18              | 0.007    | 0.004                  | > 1                  | 0.7                  | 0.1                  |
| p-value         | < 0.001  | < 0.001                | 0.3                  | 0.3                  | < 0.0001             |
| F statistic     | 55.3     | 56.2                   | 19.5                 | 18.7                 | 62.4                 |

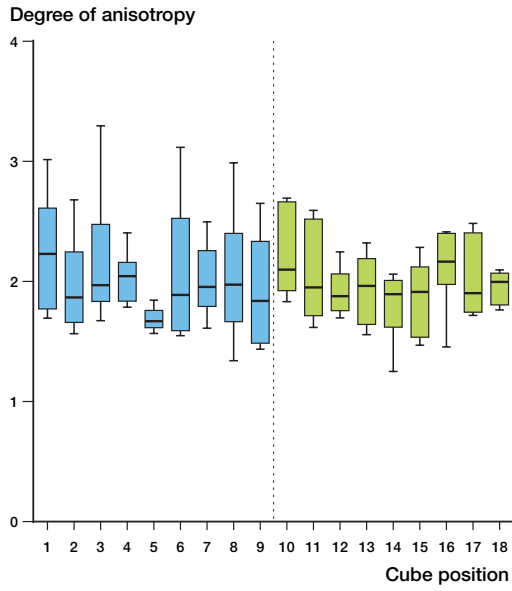

Figure 5. Degree of anisotropy (DA, with 95% CI) at different sites in the femoral head.

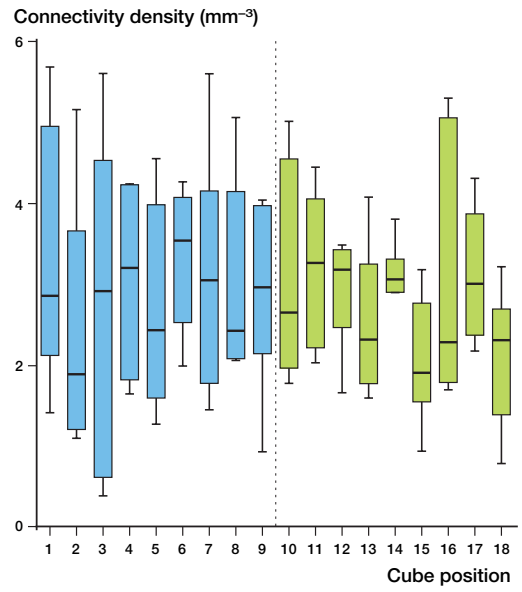

Figure 6. Connectivity density (Conn.D, with 95% CI) at different sites in the femoral head.
